# Supplementary material for: Lanthanide complexes based on a conjugated pyridine carboxylate ligand: structures, luminescence and magnetic properties
Source: Royal Society of Chemistry journal article supplement (doi:10.1039/c9ra10975g), 2020-01-01
Supplement: c9ra10975g1.pdf [file c9ra10975g1.pdf]

## Supporting Information for

### Lanthanide complexes based on conjugated pyridine carboxylate

#### ligand: structures, luminescence and magnetic properties

Rong-fang Li, Rui-hao Li, Xin-fang Liu, Xin-hong Chang, Xun Feng

*College of Chemistry and Chemical Engineering and Henan Key Laboratory of Function Oriented*

*Porous Materials, Luoyang Normal University, Luoyang, 471022, China*

#### 1. Additional Table

**Table S1** Selected bond lengths [Å] and bond angles [°] for compounds **1- 3**.

| 1           |            |             |            |             |            |
|-------------|------------|-------------|------------|-------------|------------|
| Dy1-O3      | 2.295(4)   | Dy3-O18     | 2.277(4)   | Dy4-N10     | 2.489(5)   |
| Dy2-O16     | 2.390(4)   | Dy1-O6      | 2.316(4)   | Dy2-N6      | 2.487(4)   |
| Dy1-O8      | 2.354(4)   | Dy3-O21     | 2.288(4)   | Dy4-N12     | 2.481(5)   |
| Dy3-O20     | 2.365(4)   | Dy3-O22     | 2.410(4)   | Dy2-N5      | 2.488(4)   |
| Dy2-O15     | 2.375(4)   | Dy3-O23     | 2.388(4)   | Dy4-N11     | 2.501(4)   |
| Dy1-N3      | 2.493(4)   | Dy1-O4      | 2.291(2)   | Dy3-N7      | 2.479(4)   |
| Dy2-O9      | 2.379(4)   | Dy4-O25     | 2.383(4)   | Dy1-N1      | 2.457(5)   |
| Dy2-O10     | 2.299(4)   | Dy4-O26     | 2.291(4)   | Dy1-N2      | 2.489(5)   |
| Dy2-O12     | 2.322(4)   | Dy4-O28     | 2.325(4)   | Dy4-N9      | 2.464(4)   |
| Dy4-O30     | 2.304(4)   | Dy2-O14     | 2.384(4)   | Dy1-N4      | 2.461(5)   |
| Dy3-N8      | 2.487(4)   | Dy3-O19     | 2.365(4)   | O18-Dy3-O22 | 83.97(15)  |
| O3-Dy1-O4   | 88.35(17)  | O3-Dy1-N1   | 79.45(16)  | O18-Dy3-O19 | 86.78(14)  |
| O3-Dy1-O6   | 92.46(17)  | O3-Dy1-N2   | 82.85(16)  | O18-Dy3-O20 | 83.40(15)  |
| O3-Dy1-O8   | 163.30(14) | O3-Dy1-N3   | 131.04(16) | O18-Dy3-O21 | 163.17(14) |
| O4-Dy1-N3   | 80.67(16)  | O4-Dy1-N4   | 79.43(17)  | O19-Dy3-N8  | 78.57(14)  |
| O4-Dy1-N2   | 131.06(16) | O19-Dy3-N7  | 75.78(14)  | O19-Dy3-O23 | 146.28(14) |
| O4-Dy1-O8   | 92.45(17)  | O19-Dy3-O22 | 141.02(13) | O4-Dy1-N1   | 67.45(18)  |
| O4-Dy1-O6   | 163.24(17) | O19-Dy3-O20 | 71.08(15)  | O18-Dy3-N7  | 66.45(14)  |
| O3-Dy1-N4   | 67.53(15)  | O18-Dy3-N8  | 129.88(15) | O18-Dy3-O23 | 92.81(14)  |
| O6-Dy1-O8   | 91.55(16)  | O6-Dy1-N1   | 129.13(17) | O20-Dy3-O22 | 70.27(15)  |
| O20-Dy3-O23 | 142.40(15) | O20-Dy3-N7  | 136.02(15) | O12-Dy2-N6  | 129.36(14) |
| O6-Dy-1N2   | 65.58(15)  | O20-Dy3-N8  | 133.36(16) | O14-Dy2-O16 | 142.00(14) |
| O6-Dy1-N3   | 86.22(15)  | O21-Dy3-O19 | 92.23(15)  | O14-Dy2-N5  | 73.74(14)  |
| O6-Dy1-N4   | 85.41(16)  | O21-Dy3-O20 | 80.39(16)  | O14-Dy2-N6  | 73.47(14)  |
| O8-Dy1-N1   | 85.46(15)  | O21-Dy3-O22 | 86.31(15)  | O15-Dy2-O9  | 74.51(14)  |

|             |            |             |            |             |            |
|-------------|------------|-------------|------------|-------------|------------|
| O8-Dy1-N2   | 84.07(15)  | O21-Dy3-O23 | 97.24(14)  | O15-Dy2-O14 | 145.68(15) |
| O8-Dy1-N3   | 65.41(15)  | O21-Dy3-N7  | 129.51(14) | O15-Dy2-O16 | 71.77(15)  |
| O8-Dy1-N4   | 128.99(15) | O21-Dy3-N8  | 66.05(15)  | O15-Dy2-N5  | 126.82(15) |
| N1-Dy1-N2   | 63.60(17)  | O22-Dy3-N7  | 132.59(15) | O15-Dy2-N6  | 138.05(14) |
| N1-Dy1-N3   | 135.74(17) | O22-Dy3-N8  | 134.26(14) | O16-Dy2-N5  | 74.36(14)  |
| N1-Dy1-N4   | 133.51(17) | O23-Dy3-O22 | 72.12(13)  | O16-Dy2-N6  | 74.26(14)  |
| N2-Dy1-N3   | 138.02(15) | O23-Dy3-N7  | 73.24(14)  | N6-Dy2-N5   | 63.84(14)  |
| N4-Dy1-N2   | 137.61(16) | O23-Dy3-N8  | 75.98(14)  | O28-Dy4-O25 | 87.90(15)  |
| N4-Dy1-N3   | 63.57(16)  | N7-Dy3-N8   | 63.52(15)  | O28-Dy4-N9  | 129.24(15) |
| O9-Dy2-O14  | 72.56(14)  | O25-Dy4-N9  | 83.93(14)  | O28-Dy4-N10 | 65.98(14)  |
| O9-Dy2-O16  | 145.32(14) | O25-Dy4-N10 | 80.91(14)  | O28-Dy4-N11 | 83.42(14)  |
| O9-Dy2-N5   | 134.99(14) | O25-Dy4-N11 | 65.32(14)  | O28-Dy4-N12 | 85.46(15)  |
| O9-Dy2-N6   | 130.46(15) | O25-Dy4-N12 | 129.06(13) | O12-Dy2-O9  | 87.93(15)  |
| O10-Dy2-O9  | 81.84(14)  | O26-Dy4-O25 | 90.54(16)  | O12-Dy2-O14 | 93.87(14)  |
| O10-Dy2-O12 | 164.48(14) | O26-Dy4-O28 | 163.88(14) | O12-Dy2-O15 | 75.47(14)  |
| O10-Dy2-O14 | 94.15(14)  | O26-Dy4-O30 | 90.35(16)  | O12-Dy2-O16 | 91.28(14)  |
| O10-Dy2-O15 | 90.50(14)  | O26-Dy4-N9  | 66.43(15)  | O12-Dy2-N5  | 65.54(14)  |
| O10-Dy2-O16 | 90.56(14)  | O26-Dy4-N10 | 129.55(14) | O10-Dy2-N6  | 65.85(14)  |
| O10-Dy2-N5  | 129.64(15) | O26-Dy4-N11 | 81.35(15)  | O26-Dy4-N12 | 83.08(15)  |

**2**

|                         |            |                         |           |                         |           |
|-------------------------|------------|-------------------------|-----------|-------------------------|-----------|
| Sm1-N1                  | 2.549(3)   | Sm1 -O8                 | 2.381(2)  | Sm1-O6                  | 2.659(3)  |
| Sm1-N2                  | 2.545(3)   | Sm1 -O4                 | 2.357(3)  | Sm1-O3                  | 2.451(2)  |
| Sm1-N3                  | 2.614(3)   | Sm1- O2 <sup>1</sup>    | 2.438(3)  | Sm1-N4                  | 2.659(3)  |
| N2-Sm1-N1               | 62.09(9)   | N3-Sm1-N1               | 114.70(9) | N3-Sm1-N2               | 131.55(9) |
| N4-Sm1-N1               | 144.31(9)  | N4-Sm1-N2               | 150.56(9) | N4-Sm1-N3               | 59.93(9)  |
| O2 <sup>1</sup> -Sm1-N1 | 69.51(9)   | O2 <sup>1</sup> -Sm1-N2 | 93.50(9)  | O2 <sup>1</sup> -Sm1-N3 | 132.63(9) |
| O2 <sup>1</sup> -Sm1-N4 | 88.95(9)   | O3-Sm1-N1               | 74.27(8)  | O3-Sm1-N2               | 70.80(8)  |
| O3-Sm1-N3               | 62.86(8)   | O3 -Sm1- N4             | 120.96(8) | O3-Sm1-O2 <sup>1</sup>  | 143.73(9) |
| O4-Sm1-N1               | 125.67(9)  | O6-Sm1-N2               | 94.38(9)  | O8-Sm1-O6               | 124.70(9) |
| O4-Sm1-N2               | 64.97(9)   | O6-Sm1-N3               | 115.83(9) | O8-Sm1-O4               | 157.96(9) |
| O4-Sm1-N3               | 91.50(10)  | O6-Sm1-N4               | 60.23(9)  | O8-Sm1-O3               | 87.79(8)  |
| O4-Sm1-N4               | 89.97(9)   | O6-Sm1-O2 <sup>1</sup>  | 65.23(9)  | O8-Sm1-O2 <sup>1</sup>  | 75.17(9)  |
| O4-Sm1-O2 <sup>1</sup>  | 125.73(10) | O6-Sm1-O3               | 145.53(9) | O8-Sm1-N4               | 82.97(9)  |
| O4-Sm1-O3               | 77.99(9)   | O6-Sm1-O4               | 67.55(10) | O8-Sm1-N3               | 66.88(8)  |
| O6-Sm1-N1               | 127.00(9)  | O8-Sm1-N1               | 64.54(8)  | O8-Sm1-N2               | 125.99(9) |

**3**

|         |          |        |          |         |          |
|---------|----------|--------|----------|---------|----------|
| Tb1-O2  | 2.304(2) | Tb1-N2 | 2.507(3) | Tb2-O9  | 2.392(2) |
| Tb3-O17 | 2.320(2) | Tb3-N7 | 2.491(3) | Tb4-O24 | 2.425(2) |
| Tb1-O4  | 2.331(3) | Tb1-N3 | 2.505(3) | Tb2-O10 | 2.403(2) |
| Tb3-O19 | 2.331(2) | Tb3-N8 | 2.511(2) | Tb4-O25 | 2.400(2) |
| Tb1-O6  | 2.315(3) | Tb1-N4 | 2.480(3) | Tb2-O11 | 2.336(2) |

|             |            |              |            |             |           |
|-------------|------------|--------------|------------|-------------|-----------|
| Tb3-O21     | 2.313(3)   | Tb3-N9       | 2.515(3)   | Tb4-O26     | 2.294(2)  |
| Tb1-O8      | 2.375(2)   | Tb1-N1       | 2.4609(15) | Tb2-O13     | 2.410(2)  |
| Tb3-O23     | 2.402(2)   | Tb3-N10      | 2.488(3)   | Tb4-O28     | 2.307(2)  |
| Tb2-O14     | 2.396(2)   | Tb4-O30      | 2.378(2)   | Tb2-O15     | 2.315(2)  |
| Tb4-O31     | 2.388(2)   | Tb2-N5       | 2.507(2)   | Tb4-N11     | 2.495(3)  |
| Tb2- N6     | 2.497(3)   | Tb4-N12      | 2.503(3)   |             |           |
| O23-Tb3-N8  | 65.25(8)   | O8-Tb1-N4    | 85.63(9)   | O23-Tb3- N9 | 80.52(8)  |
| O8-Tb1-N2   | 65.31(8)   | O23-Tb3-N7   | 128.53(8)  | O8-Tb1-N3   | 84.10(9)  |
| O21-Tb3-N9  | 129.21(8)  | O6-Tb1-N1    | 79.89(9)   | O21-Tb3-N10 | 66.31(9)  |
| O6-Tb1-N3   | 130.00(9)  | O21-Tb3-N8   | 81.55(9)   | O6-Tb1-N4   | 66.71(10) |
| O21-Tb3-O23 | 90.42(9)   | O6-Tb1-N2    | 81.24(9)   | O21-Tb3-N7  | 83.16(9)  |
| O17-Tb3-N8  | 129.31(8)  | O6-Tb1-O4    | 164.37(9)  | O21-Tb3-O19 | 164.46(8) |
| O4-Tb1-N1   | 85.94(8)   | O21-Tb3-O17  | 90.22(9)   | O6-Tb1-O8   | 92.18(10) |
| O2-Tb1-N2   | 130.05(9)  | O4-Tb1-N4    | 128.75(10) | O19-Tb3-N10 | 128.61(9) |
| O17-Tb3-N7  | 66.09(8)   | O4-Tb1-N3    | 65.51(9)   | O19-Tb3-N9  | 65.51(8)  |
| O2-Tb1-O8   | 164.34(8)  | O4-Tb1-N2    | 86.54(9)   | O19-Tb3-N8  | 83.55(8)  |
| O17-Tb3-O23 | 165.31(7)  | O4-Tb1-O8    | 91.52(9)   | O19-Tb3-N7  | 86.22(9)  |
| O2-Tb1-O6   | 87.98(10)  | O2-Tb1-N1    | 66.77(8)   | O19-Tb3-O23 | 87.34(9)  |
| O17-Tb3-O19 | 95.82(9)   | O2-Tb1-N4    | 80.05(9)   | O17-Tb3-N10 | 82.69(9)  |
| O2-Tb1-O4   | 92.51(10)  | O2-Tb1-N3    | 83.82(9)   | O17-Tb3-N9  | 87.72(9)  |
| O23-Tb3-N10 | 84.14(8)   | N3-Tb1-N2    | 138.16(9)  | N7-Tb3-N8   | 63.29(9)  |
| N4-Tb1-N2   | 135.81(10) | N7-Tb3-N9    | 139.59(9)  | N4-Tb1-N3   | 63.29(10) |
| N8-Tb3-N9   | 134.80(9)  | N1-Tb1-N2    | 63.35(8)   | N10-Tb3-N7  | 136.17(9) |
| N1-Tb1-N3   | 138.15(9)  | N10-Tb3-N8   | 135.37(9)  | N1-Tb1-N4   | 133.41(9) |
| N10-Tb3-N9  | 63.10(9)   | O9-Tb2-O10   | 72.72(8)   | O24-Tb4-N11 | 132.93(9) |
| O9-Tb2-O13  | 145.69(8)  | O24-Tb4-N12  | 134.49(8)  | O9-Tb2-O14  | 73.72(9)  |
| O25-Tb4-O24 | 72.08(8)   | O9-Tb2-N5    | 135.22(8)  | O25-Tb4-N11 | 73.69(9)  |
| O9-Tb2-N6   | 130.80(9)  | O25-Tb4-N12  | 75.99(8)   | O10-Tb2-O13 | 141.41(8) |
| O26-Tb4-O24 | 84.42(9)   | O10-Tb2-N5   | 74.19(8)   | O26-Tb4-O25 | 92.98(9)  |
| O11-Tb2-O14 | 76.20(8)   | O26-Tb4-N12  | 129.18(9)  | O28-Tb4-O24 | 86.63(9)  |
| O26-Tb4-N11 | 66.11(9)   | O11-Tb2-N5   | 65.28(8)   | O11-Tb2-N6  | 128.66(8) |
| O11-Tb2-O13 | 90.87(9)   | O28-Tb4-O25  | 97.06(9)   | O13-Tb2-N5  | 73.86(8)  |
| O26-Tb4-O31 | 86.35(9)   | O28-Tb4-O30  | 81.75(9)   | O13-Tb2-N6  | 73.69(9)  |
| O11-Tb2-O10 | 94.97(8)   | O28-Tb4-O31  | 92.04(9)   | O14-Tb2-O10 | 145.48(8) |
| O26-Tb4-O30 | 82.51(9)   | O28-Tb4-N11  | 129.03(9)  | O14-Tb2-O13 | 72.82(9)  |
| O11-Tb2-O9  | 88.46(9)   | O28-Tb4-N12  | 65.96(9)   | O14-Tb2-N5  | 127.76(9) |
| O10--Tb2-N6 | 72.98(8)   | O26-Tb4-O28  | 163.82(8)  | O30-Tb4-O24 | 69.84(9)  |
| O14-Tb2-N6  | 138.11(9)  | O30-Tb4-O25  | 141.91(9)  | O15-Tb2-O9  | 82.04(8)  |
| O30-Tb4-O31 | 70.82(9)   | O15- Tb2-O10 | 92.86(9)   | O30-Tb4-N11 | 135.25(9) |
| O15-Tb2-O11 | 165.33(8)  | O30-Tb4-N12  | 134.55(10) | O15-Tb2-O13 | 90.72(9)  |
| O31-Tb4-O24 | 140.41(8)  | O15-Tb2-O14  | 90.36(8)   | O31-Tb4-O25 | 146.94(8) |

## 2. Additional figures

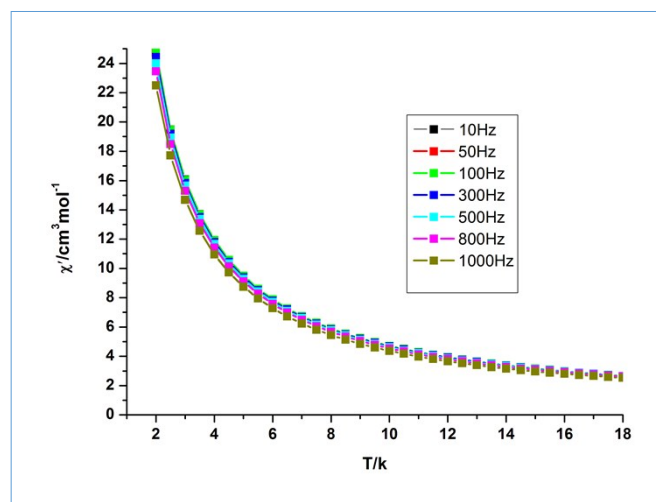

Figure S1 Frequency dependence of in-phase components of ac susceptibility at different temperature for Dy-1 under zero dc field.

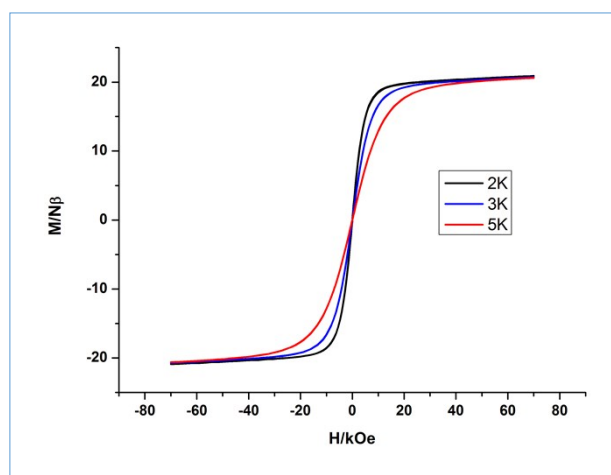

Figure S2 View of  $M$  versus  $HT^{-1}$  plots for compound Dy-1.
